# Supplementary material
Source: publisher figshare collection journal article supplement (https://frontiersin.figshare.com/ndownloader/files/32836112)
Supplement: Supplementary file [file 32836112]

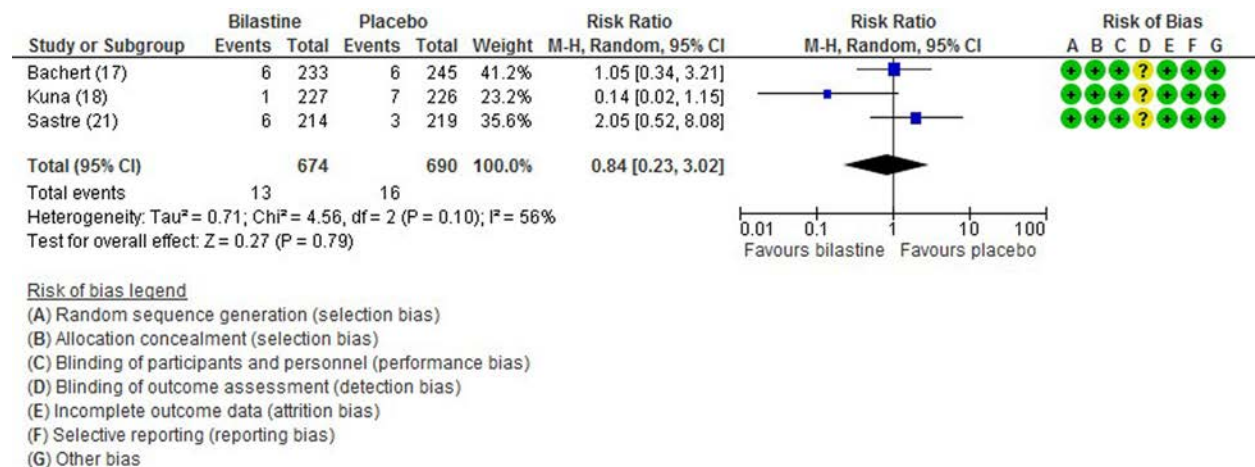

**Supplementary Figure 1.** Comparison between bilastine and placebo for fatigue. *CI* Confidence interval, *df* degrees of freedom

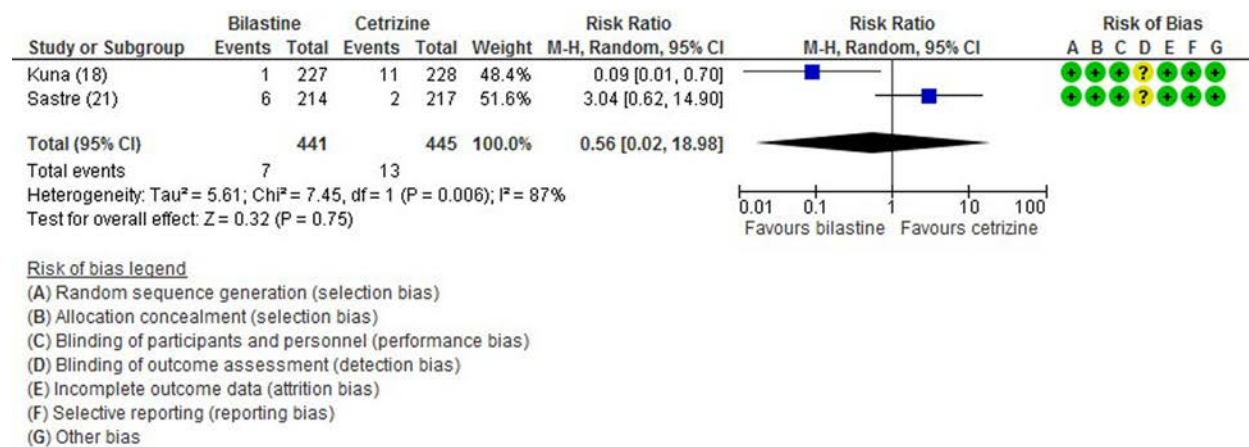

**Supplementary Figure 2.** Comparison between bilastine and cetirizine for fatigue. *CI* Confidence interval, *df* degrees of freedom
